# Supplementary material for: Exploring the catalytic activity of graphene-based TM-NxC4-xsingle atom catalysts for the oxygen reduction reactionviadensity functional theory calculation
Source: Royal Society of Chemistry journal article supplement (doi:10.1039/d3cp01168b), 2023-01-01
Supplement: d3cp01168b1.pdf [file d3cp01168b1.pdf]

Supporting Information

for

**Exploring the catalytic activity of graphene-based TM-N<sub>x</sub>C<sub>4-x</sub> single  
atom catalysts for oxygen reduction reaction via density functional  
theory calculation**

Zhengwei Du<sup>1</sup>, Kaiming Deng<sup>1,2</sup>, Erjun Kan<sup>1,2</sup>, Cheng Zhan<sup>1,2\*</sup>.

<sup>1</sup>Department of Applied Physics, Nanjing University of Science and Technology,  
Nanjing 210094, China

<sup>2</sup>MIT Key Laboratory of Semiconductor Microstructure and Quantum Sensing

**Table S1.** The binding energy ( $E_b$ ) of transition metals. The theoretical overpotential ( $\eta$ ), Gibbs free energy change of the oxygenated intermediates ( $\Delta G^*_{\text{OOH}}$ ,  $\Delta G^*_{\text{O}}$ ,  $\Delta G^*_{\text{OH}}$ ), and limiting potential ( $U_L$ ) on TM-N<sub>x</sub>C<sub>y</sub>.

|                                 | $E_b$ (eV) | $\eta$ (V) | $\Delta G^*_{\text{OOH}}$ (eV) | $\Delta G^*_{\text{O}}$ (eV) | $\Delta G^*_{\text{OH}}$ (eV) | $U_L$ (V)                       |
|---------------------------------|------------|------------|--------------------------------|------------------------------|-------------------------------|---------------------------------|
| VN <sub>4</sub>                 | -3.28      | 1.62       | 2.85                           | 0.64                         | -0.39                         | -0.39 (U <sub>L4</sub> )        |
| VN <sub>3</sub> C               | -3.02      | 2.92       | 1.54                           | -1.31                        | -1.69                         | -1.69 (U <sub>L4</sub> )        |
| VN <sub>2</sub> C <sub>2</sub>  | -2.14      | 3.09       | 1.43                           | -1.24                        | -1.86                         | -1.86 (U <sub>L4</sub> )        |
| VNC <sub>3</sub>                | -2.22      | 3.03       | 1.75                           | -1.43                        | -1.80                         | -1.8 (U <sub>L4</sub> )         |
| VC <sub>4</sub>                 | -2.15      | 3.44       | 1.16                           | -1.44                        | -2.22                         | -2.22 (U <sub>L4</sub> )        |
| CrN <sub>4</sub>                | -4.39      | 0.45       | 3.98                           | 2.03                         | 0.78                          | 0.78 (U <sub>L4</sub> )         |
| CrN <sub>3</sub> C              | -2.41      | 2.4        | 2.61                           | -0.66                        | -1.17                         | -1.17 (U <sub>L4</sub> )        |
| CrN <sub>2</sub> C <sub>2</sub> | -3.12      | 1.61       | 3.42                           | -0.14                        | -0.38                         | -0.38 (U <sub>L4</sub> )        |
| CrNC <sub>3</sub>               | -4.75      | 1.28       | 3.17                           | 0.52                         | -0.05                         | -0.05 (U <sub>L4</sub> )        |
| CrC <sub>4</sub>                | -1.22      | 2.39       | 2.24                           | -0.62                        | -1.16                         | -1.16 (U <sub>L4</sub> )        |
| MnN <sub>4</sub>                | -5.34      | 1.06       | 4.75                           | 2.44                         | 1.39                          | 0.17 (U <sub>L1</sub> )         |
| MnN <sub>3</sub> C              | -5.91      | 1.01       | 3.45                           | 2.15                         | 0.22                          | 0.22 (U <sub>L4</sub> )         |
| MnN <sub>2</sub> C <sub>2</sub> | -5.39      | 0.86       | 3.55                           | 1.87                         | 1.50                          | <u>0.37</u> (U <sub>L3</sub> )  |
| MnNC <sub>3</sub>               | -5.48      | 0.7        | 3.58                           | 1.73                         | 1.20                          | <u>0.53</u> (U <sub>L3</sub> )  |
| MnC <sub>4</sub>                | -3.64      | 1.35       | 3.19                           | 0.73                         | -0.12                         | -0.12 (U <sub>L4</sub> )        |
| FeN <sub>4</sub>                | -2.66      | 0.47       | 4.16                           | 1.97                         | 1.06                          | 0.76 (U <sub>L1</sub> )         |
| FeN <sub>3</sub> C              | -2.88      | 0.86       | 3.65                           | 1.84                         | 0.37                          | 0.37 (U <sub>L4</sub> )         |
| FeN <sub>2</sub> C <sub>2</sub> | -2.47      | 0.75       | 3.83                           | 1.98                         | 0.48                          | 0.48 (U <sub>L4</sub> )         |
| FeNC <sub>3</sub>               | -2.63      | 0.68       | 4.08                           | 1.68                         | 0.55                          | 0.55 (U <sub>L4</sub> )         |
| FeC <sub>4</sub>                | -0.84      | 1.35       | 3.18                           | 1.39                         | -0.12                         | -0.12 (U <sub>L4</sub> )        |
| CoN <sub>4</sub>                | -2.92      | 0.57       | 4.25                           | 3.59                         | 0.85                          | <u>0.66</u> (U <sub>L2</sub> )  |
| CoN <sub>3</sub> C              | -3.30      | 0.4        | 4.09                           | 2.37                         | 1.02                          | 0.83 (U <sub>L1</sub> )         |
| CoN <sub>2</sub> C <sub>2</sub> | -2.63      | 0.48       | 3.85                           | 2.04                         | 0.75                          | 0.75 (U <sub>L4</sub> )         |
| CoNC <sub>3</sub>               | -2.80      | 0.43       | 4.12                           | 2.02                         | 0.86                          | 0.80 (U <sub>L1</sub> )         |
| CoC <sub>4</sub>                | -1.03      | 0.87       | 3.51                           | 1.56                         | 0.36                          | 0.36 (U <sub>L4</sub> )         |
| NiN <sub>4</sub>                | -2.93      | 1.63       | 5.32                           | 4.95                         | 2.46                          | -0.40 (U <sub>L1</sub> )        |
| NiN <sub>3</sub> C              | -3.51      | 0.98       | 4.67                           | 3.81                         | 1.64                          | 0.25 (U <sub>L1</sub> )         |
| NiN <sub>2</sub> C <sub>2</sub> | -3.03      | 1.81       | 5.50                           | 4.11                         | 2.46                          | -0.58 (U <sub>L1</sub> )        |
| NiNC <sub>3</sub>               | -2.87      | 0.81       | 4.50                           | 3.15                         | 1.48                          | 0.42 (U <sub>L1</sub> )         |
| NiC <sub>4</sub>                | -1.19      | 0.41       | 4.10                           | 2.60                         | 1.06                          | 0.82 (U <sub>L1</sub> )         |
| CuN <sub>4</sub>                | -1.62      | 1.6        | 5.29                           | 4.64                         | 2.48                          | -0.37 (U <sub>L1</sub> )        |
| CuN <sub>3</sub> C              | -2.04      | 1.79       | 4.66                           | 1.15                         | 1.71                          | <u>-0.56</u> (U <sub>L3</sub> ) |
| CuN <sub>2</sub> C <sub>2</sub> | -2.21      | 1.08       | 4.77                           | 4.10                         | 1.77                          | 0.15 (U <sub>L1</sub> )         |
| CuNC <sub>3</sub>               | -2.61      | 2.23       | 4.98                           | 1.23                         | 2.23                          | <u>-1.00</u> (U <sub>L3</sub> ) |
| CuC <sub>4</sub>                | -1.12      | 1.31       | 5.00                           | 4.2                          | 2.12                          | -0.08 (U <sub>L1</sub> )        |
| ZnN <sub>4</sub>                | -2.65      | 0.98       | 4.67                           | 3.90                         | 1.40                          | 0.25 (U <sub>L1</sub> )         |
| ZnN <sub>3</sub> C              | -2.55      | 0.46       | 4.09                           | 3.22                         | 0.77                          | 0.77 (U <sub>L4</sub> )         |
| ZnN <sub>2</sub> C <sub>2</sub> | -1.72      | 0.5        | 3.97                           | 3.24                         | 0.78                          | <u>0.73</u> (U <sub>L2</sub> )  |
| ZnNC <sub>3</sub>               | -2.07      | 0.49       | 4.18                           | 3.39                         | 0.95                          | 0.74 (U <sub>L1</sub> )         |
| ZnC <sub>4</sub>                | -1.36      | 0.95       | 4.64                           | 3.98                         | 1.67                          | 0.28 (U <sub>L1</sub> )         |

**Table S2.** The binding energy ( $E_b$ /eV) of transition metals on three different structures of the  $\text{TMN}_2\text{C}_2$ .

|                            | V            | Cr           | Mn           | Fe           | Co           | Ni           | Cu           | Zn           |
|----------------------------|--------------|--------------|--------------|--------------|--------------|--------------|--------------|--------------|
| $\text{N}_2\text{C}_2$ (1) | <b>-2.15</b> | <b>-3.12</b> | <b>-5.39</b> | <b>-2.47</b> | <b>-2.63</b> | <b>-3.03</b> | <b>-2.21</b> | <b>-1.72</b> |
| $\text{N}_2\text{C}_2$ (2) | -2.11        | -2.95        | -5.23        | -2.24        | -2.32        | -2.67        | -1.88        | -1.47        |
| $\text{N}_2\text{C}_2$ (3) | -2.04        | -2.88        | -5.10        | -2.07        | -2.19        | -2.49        | -1.60        | -1.46        |

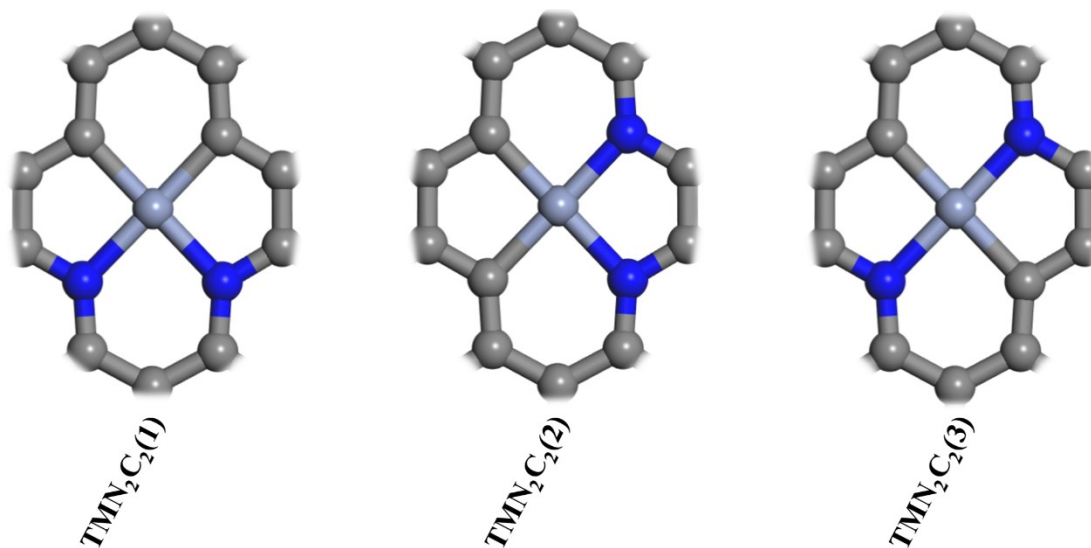

**Figure S1.** Three different structures of  $\text{TMN}_2\text{C}_2$

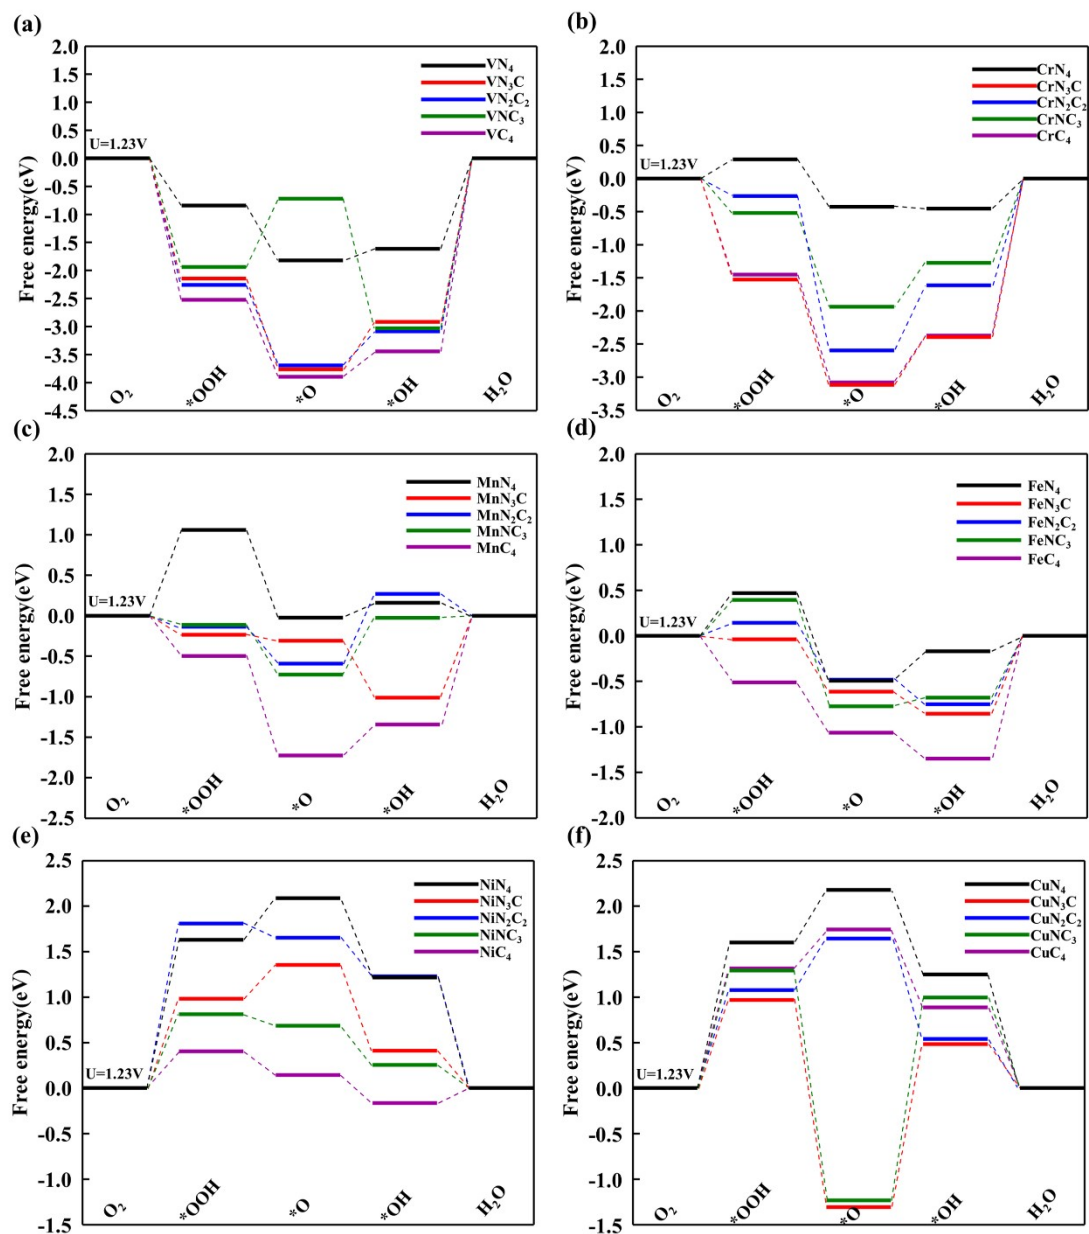

Figure S2. ORR reaction profiles of (a) V-N<sub>x</sub>C<sub>y</sub>, (b) Cr-N<sub>x</sub>C<sub>y</sub>, (c) Mn-N<sub>x</sub>C<sub>y</sub>, (d) Fe-N<sub>x</sub>C<sub>y</sub>, (e) Ni-N<sub>x</sub>C<sub>y</sub>, and (f) Cu-N<sub>x</sub>C<sub>y</sub>.

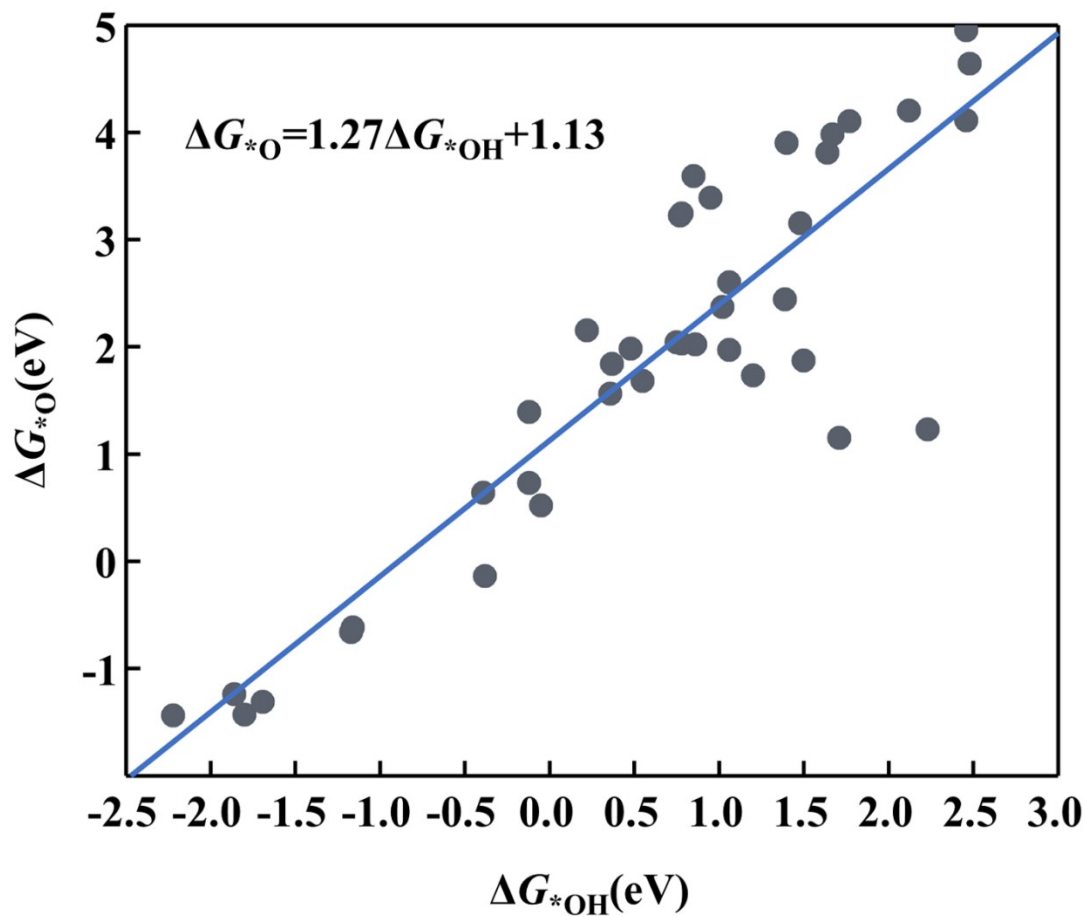

**Figure S3.** Scaling relationships for adsorption free energy of \*OH vs \*O.

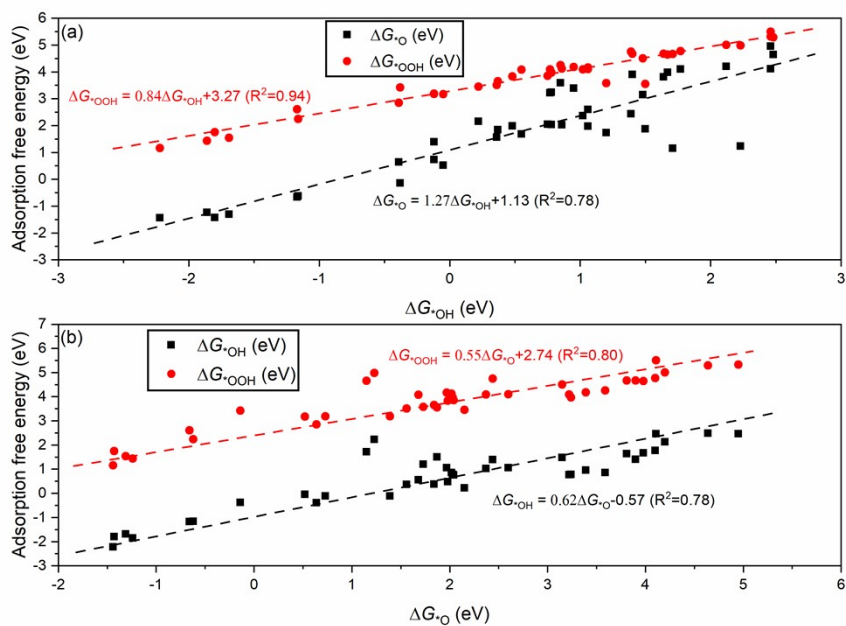

**Figure S4.** Linear scaling relation of (a)  $\Delta G^*O$  vs.  $\Delta G^*OH$ ,  $\Delta G^*OOH$  vs.  $\Delta G^*OH$ ; (b)  $\Delta G^*OH$  vs.  $\Delta G^*O$ ,  $\Delta G^*OOH$  vs.  $\Delta G^*O$ .

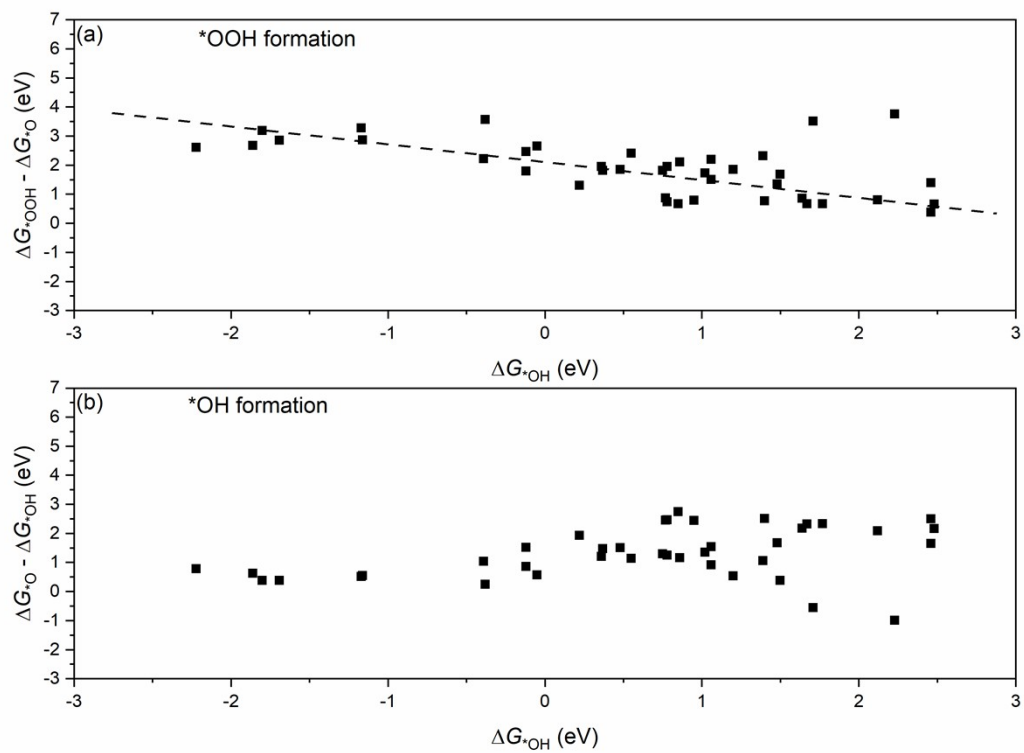

Figure S5. Linear scaling relation of (a)  $\Delta G^*_{OOH} - \Delta G^*_O$  vs.  $\Delta G^*_{OH}$ ; (b)  $\Delta G^*_O - \Delta G^*_{OH}$  vs.  $\Delta G^*_{OH}$

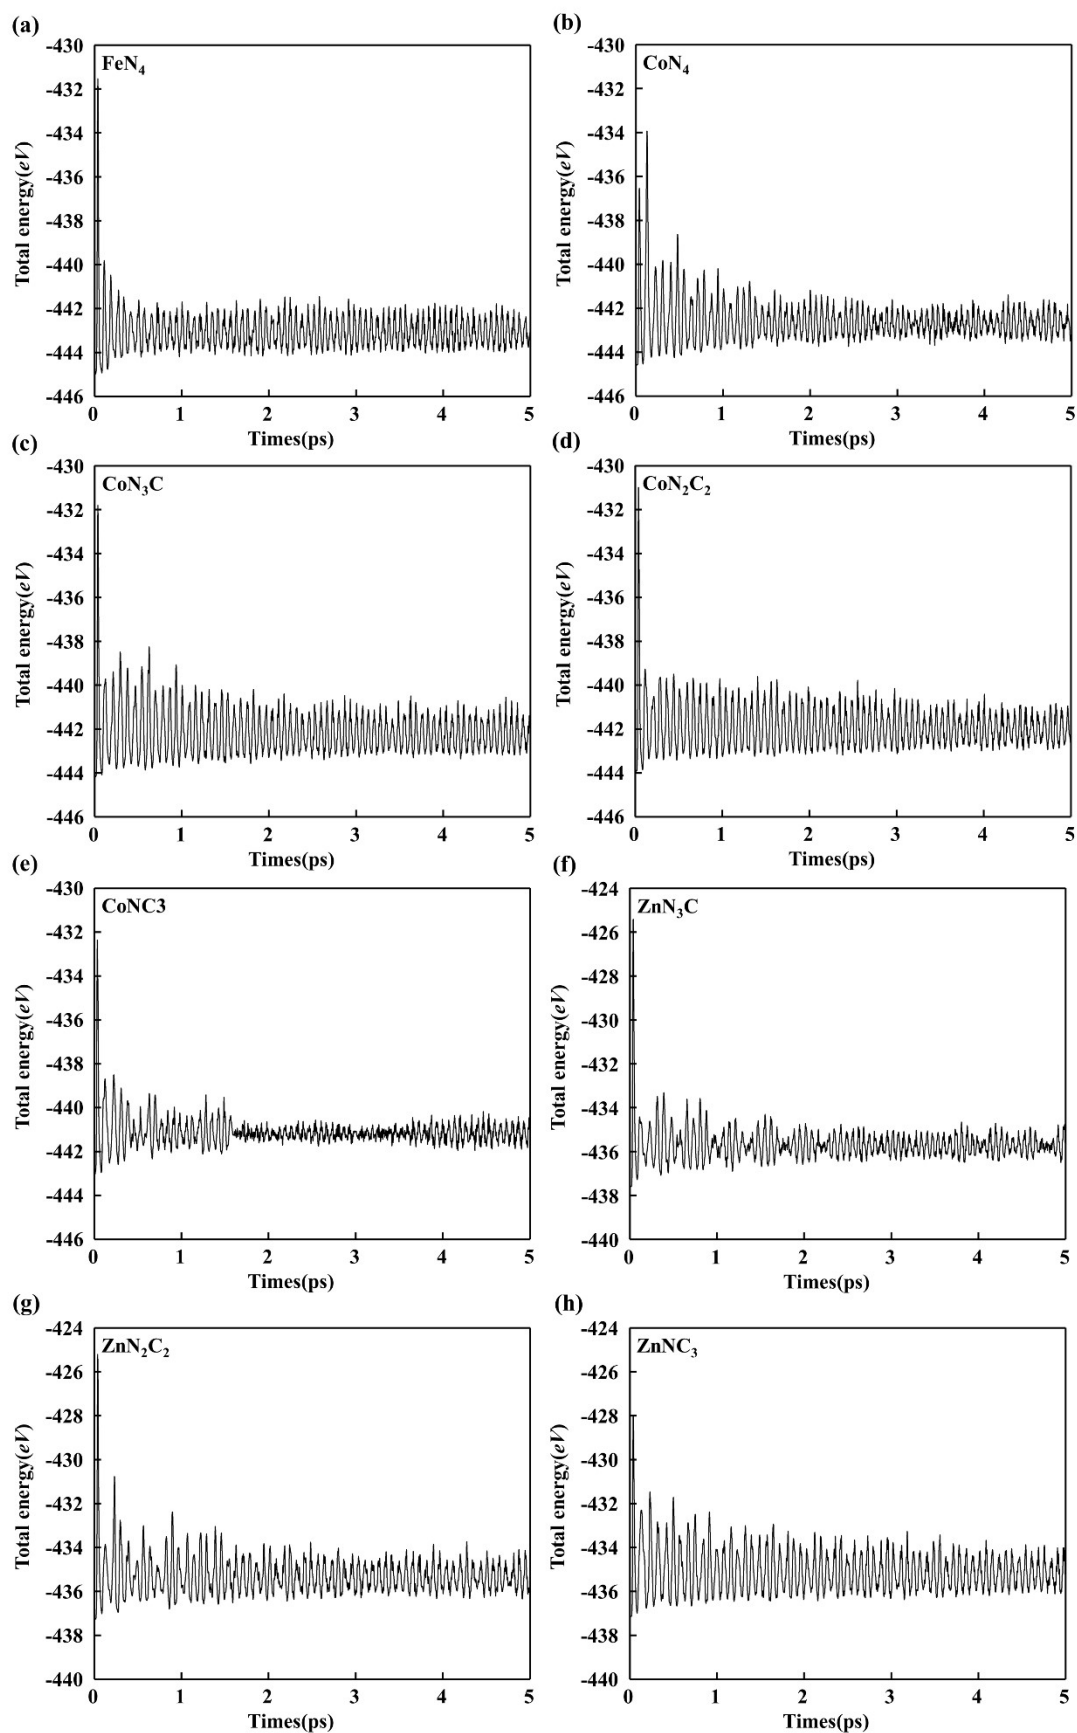

**Figure S6.** Variations of energy versus the AIMD simulation time for (a)  $\text{FeN}_4$ , (b)  $\text{CoN}_4$ , (c)

CoN<sub>3</sub>C, (d) CoN<sub>2</sub>C<sub>2</sub>, (e) CoNC<sub>3</sub>, (f) ZnN<sub>3</sub>C, (g) ZnN<sub>2</sub>C<sub>2</sub>, and (h) ZnNC<sub>3</sub>.
